# Supplementary material
Source: Research Square preprint supplement (doi:10.21203/rs.3.rs-8482877/v1)
Supplement: Supplementary file 1 [file 5e3f2ba7286377565a7075db.docx]

Supplementary Material

Appendix A. Trunk acceleration – derived gait indexes calculation.

The trunk acceleration-derived gait indexes were calculated using gait trials that included at least 20 consecutive accurately recorded strides. To guarantee a steady-state walking assessment, we excluded the first and last two strides of each 30-meter walk. To identify initial contacts (positive peaks occurring between zero-crossings), the vertical acceleration signal was first detrended and then low-pass filtered with a FIR filter set at 3.2 Hz. A Gaussian continuous wavelet transformation (scale 9, gauss 1) was applied to numerically integrate and differentiate the resulting signal.

*HR and iHR computation*

Prior to analysis, acceleration data was demeaned, and low-pass filtered at 20 Hz with a zero-lag fourth-order Butterworth filter. Twenty harmonics were calculated for each gait trial based on stride time. Each stride's trunk acceleration was converted into a single sinusoidal waveform using a discrete Fourier transformation. To calculate sine and cosine coefficients for each stride segment, a truncated Fourier series (up to the 20th harmonic) was estimated using numerical integration. Harmonic amplitudes were calculated using the Euclidean norm of the respective sine and cosine coefficients. HR in the antero – posterior and vertical directions were obtained by dividing the sum of the first ten even harmonics by the sum of the first ten odd harmonics. HR in the medio – lateral direction was computed by adding the amplitudes of the odd harmonics and dividing them by the amplitudes of the even harmonics.

HRs were calculated for each stride and averaged over the gait trial as follows:

where represents the amplitude of the first 20 even harmonics, and A2i–1 represents the amplitude of the first 20 odd harmonics.

To calculate iHR, Fourier coefficients were obtained for each cycle as described above, and harmonic power was calculated by adding the squared sine and cosine coefficients. The iHR was calculated as the percentage of total harmonic power contained in intrinsic harmonics relative to the total power of intrinsic and extrinsic harmonics, as follows:

where and are the power of the intrinsic and extrinsic *jth* harmonics.

*Percent Determinism in Recurrence Quantification Analysis (RQAdet) computation*

RQAdet was computed from recurrence plots reconstructed from trunk acceleration signals in the three spatial directions. To standardize the length of the time-series length across participants, the selected segment was resampled to 2000 points using radial basis function interpolation, and resampling accuracy was measured using standard error metrics. The time-delay embedding approach was used to reconstruct phase space. To determine the optimal time delay (𝜏), the first minimum of the average mutual information (AMI) function was evaluated across a range of delays (5-19 samples) and histogram bin numbers (4-19). The combination yielding the lowest AMI minimum was chosen. The embedding dimension (m) was identified using a false nearest neighbors (FNN) approach, testing dimensions from 3 to 10 and selecting the smallest dimension with a proportion of false neighbors (≤1%) across multiple tolerance thresholds (Rtol = 15-19, Atol = 2.0-4.0). Recurrence plots were generated using a fixed-radius nearest-neighbor criterion, with recurrence thresholds set at a percentage (5-20%) of the maximum phase-space distance. Percent determinism was calculated from the upper triangular recurrence matrix (excluding the main diagonal) as:

Where *P(l)* is the frequency distribution of the lengths *l* of the diagonal lines in the recurrence matrix (i.e., the number of patterns with length l).

*Multiscale Sample Entropy (MSE) computation*

The central 20 strides of each walking bout were concatenated to form a time series for analysis. To ensure temporal normalization across participants, the resulting signal was resampled to a fixed length of 2000 points via radial basis function (RBF) interpolation. The signals were normalized to zero mean and unit variance. The was calculated using a sample entropy algorithm with embedding dimension m=2 and time delay 𝜏=1. For multiscale analysis, the normalized signal was coarse-grained by averaging non-overlapping data points, and sample entropy was calculated at scale factor 4. The tolerance parameter was set to r = 0.10, expressed as a percentage of the signal standard deviation.

Sample entropy was defined as the negative natural logarithm of the conditional probability that two sequences of length m that are similar within tolerance r will remain similar at length m+1, excluding self-matching.

Supplementary Table S1

| **Feature** | **Mean** | **Sd** |
| --- | --- | --- |
| **HR V** | 2.145 | 0.643 |
| **HR ML** | 1.754 | 0.447 |
| **HR AP** | 2.042 | 0.686 |
| **iHR V** | 64.93 | 12.02 |
| **iHR ML** | 54.63 | 8.21 |
| **iHR AP** | 70.88 | 7.98 |
| **MSE V** | 1.441 | 0.178 |
| **MSE ML** | 1.574 | 0.306 |
| **MSE AP** | 1.361 | 0.222 |
| **%det V** | 56.81 | 12.34 |
| **%det ML** | 46.64 | 17.26 |
| **%det AP** | 40.94 | 14.13 |
| **Sex (M=1, F=2)** | 1.12 | 0.54 |
| **Age (years)** | 71.78 | 7.37 |
| **Height (cm)** | 168.4 | 8.9 |
| **Weight (kg)** | 74.9 | 11.8 |
| **Disease Duration (years)** | 8.18 | 6.14 |
| **Age of Onset (years)** | 63.74 | 8.60 |
| **Onset category (1–3)** | 2.18 | 0.56 |
| **LEDD (mg/day)** | 620.69 | 371.14 |
| **Postural Alteration (1=Yes, 2=No)** | 1.55 | 0.49 |
| **Postural Type (1–4)** | 1.89 | 0.91 |
| **Falls last year (1=Yes,2=No)** | 1.39 | 0.49 |
| **UPDRS-III** | 23.56 | 11.21 |
| **Hoehn & Yahr** | 2.70 | 0.86 |
| **Tilt (degree)** | 4.18 | 1.86 |
| **Obliquity (degree)** | 4.95 | 2.27 |
| **Rotation (degree)** | 5.76 | 2.96 |
| **Stance (%)** | 61.40 | 2.33 |
| **Swing (%)** | 38.91 | 2.43 |
| **Double Support (%)** | 11.35 | 2.24 |
| **Single Support (%)** | 38.98 | 2.33 |
| **Stride Length (m)** | 1.034 | 0.266 |
| **Cadence (steps/min)** | 107.45 | 13.39 |
| **Gait Speed (m/s)** | 0.939 | 0.349 |

**Supplementary Table S1.** Descriptive statistics of all biomechanical and clinical variables included in the study (n = 274). Values are reported as mean ± standard deviation. Biomechanical metrics include harmonic ratio (HR), improved harmonic ratio (iHR), multiscale entropy (), and recurrence-quantification–based determinism (%det) across the three movement planes (vertical, medio-lateral, antero-posterior). Clinical variables include demographic, disease-related and medication characteristics, postural alterations, falls history, motor severity (UPDRS-III), and gait spatiotemporal parameters. Coding of categorical variables: **Sex** (1 = male, 2 = female), **Postural alteration** (1 = yes, 2 = no), **Postural type** (1 = camptocormia, 2 = Pisa syndrome, 3 = dorsal flexion, 4 = lateral tilt), **Falls last year** (1 = yes, 2 = no), **Onset category** (1 = early, 2 = middle, 3 = late).

Supplementary Table S2

| **Target Definition** | **Positives (n)** | **AUC** | **95% CI AUC** | **F1-score** |
| --- | --- | --- | --- | --- |
| ≥3 prodromes | 110 | 0.726 | 0.64 – 0.83 | 0.635 |
| Constipation + Depression | 89 | 0.677 | 0.56 – 0.81 | 0.361 |
| Constipation | 146 | 0.669 | 0.54 – 0.79 | 0.558 |
| REM + Depression | 116 | 0.651 | 0.51 – 0.77 | 0.452 |
| Hyposmia + REM | 57 | 0.643 | 0.46 – 0.80 | 0.118 |
| Constipation + REM | 92 | 0.632 | 0.47 – 0.77 | 0.379 |
| Hyposmia | 91 | 0.625 | 0.49 – 0.75 | 0.389 |
| Constipation + Hyposmia | 67 | 0.590 | 0.44 – 0.73 | 0.196 |
| Depression | 158 | 0.589 | 0.47 – 0.72 | 0.731 |
| REM | 168 | 0.540 | 0.39 – 0.68 | 0.755 |
| Hyposmia + REM + Depression | 42 | 0.558 | 0.39 – 0.75 | 0.332 |
| Constipation + Hyposmia + REM | 43 | 0.566 | 0.40 – 0.74 | 0.348 |
| ≥2 prodromes | 193 | 0.482 | 0.31 – 0.63 | 0.861 |
| ≥1 prodrome | 270 | 0.451 | 0.12 – 0.77 | 0.967 |
| =4 prodromes | 25 | 0.393 | 0.26 – 0.53 | 0.000 |

Supplementary Table S2. Preliminary Random Forest screening of all prodromal-output definitions*.* Each prodromal symptom (constipation, hyposmia, REM sleep behavior disorder, depression) and every possible combination among them, including cumulative definitions (≥1, ≥2, ≥3, =4 symptoms), was evaluated as a candidate binary target without hyperparameter tuning or feature engineering. For each target definition, the number of positive cases, AUC, 95% bootstrap confidence interval for AUC (2000 iterations), and F1-score are reported. The exploratory comparison shows that outputs reflecting higher prodromal burden (≥3 symptoms) consistently yielded the strongest and most stable discriminative performance, with the best balance between AUC and F1-score. Based on this preliminary screening, the ≥3-prodrome definition was selected as the reference target for all subsequent analyses.

Supplementary Table S3

| **Feature** | **F-score** | **p-value** | **Importance** | **Filter** | **Wrapper** | **Embedded** | **Total methods** |
| --- | --- | --- | --- | --- | --- | --- | --- |
| MSE ML | 44.11 | 1.7 × 10⁻¹⁰ | 0.17 | 1 | 1 | 1 | 3 |
| Weight | 7.01 | 8.6 × 10⁻³ | 0.12 | 1 | 1 | 1 | 3 |
| iHR V | 12.66 | 4.4 × 10⁻⁴ | 0.11 | 1 | 1 | 1 | 3 |
| MSE AP | 10.24 | 1.5 × 10⁻³ | 0.10 | 1 | 1 | 1 | 3 |
| MSE V | 11.94 | 6.4 × 10⁻⁴ | 0.10 | 1 | 1 | 1 | 3 |
| Cadence | 4.51 | 3.5 × 10⁻² | 0.09 | 1 | 1 | 0 | 2 |
| DD | 3.90 | 4.9 × 10⁻² | 0.08 | 1 | 1 | 0 | 2 |
| %DET AP | 3.92 | 4.9 × 10⁻² | 0.08 | 1 | 1 | 0 | 2 |
| %DET ML | 5.28 | 2.2 × 10⁻² | 0.08 | 1 | 1 | 0 | 2 |
| Height | 4.60 | 3.3 × 10⁻² | 0.07 | 1 | 1 | 0 | 2 |
| Sex | 8.78 | 3.3 × 10⁻³ | – | 1 | 0 | 0 | 1 |

Supplementary Table S3. Summary of the feature selection workflow. For each variable, the table reports the ANOVA F-score and p-value (filter stage), the ranking obtained through recursive feature elimination (wrapper stage), and the Random Forest importance score (embedded stage). Binary indicators (1 = selected, 0 = not selected) denote inclusion at each step of the pipeline. Consensus features selected simultaneously by all three approaches, , Weight, , , and , were retained for model training. These variables represent the most stable and convergent predictors across independent selection criteria.

Supplementary Table S4

| **Feature** | **KS Statistic** | **p-value** | **Interpretation** |
| --- | --- | --- | --- |
| Age | 0.064 | 0.669 | No difference |
| DD | 0.028 | 0.969 | No difference |
| Gait Speed | 0.041 | 0.992 | No difference (after matching) |
| 𝑀𝑆𝐸𝑎𝑝 | 0.097 | 0.128 | No difference |
| 𝑀𝑆𝐸𝑚𝑙 | 0.001 | 0.999 | No difference |
| 𝑀𝑆𝐸𝑣 | 0.088 | 0.272 | No difference |
| Body Weight | 0.071 | 0.597 | No difference |
| 𝑖𝐻𝑅𝑣 | 0.083 | 0.179 | No difference |

Supplementary Table S4. Kolmogorov–Smirnov tests comparing the distributions of real and CTGAN-generated samples across the key biomechanical, demographic, and clinical variables. After applying a feature-wise distribution matching step for gait speed, no variable showed significant discrepancies between real and synthetic data (all p > 0.05), confirming the structural fidelity of the generated samples. , were accurately reproduced, together with , body weight, age, and disease duration (DD).

Supplementary Table S5

| **Feature** | **mean |SHAP| ± sd** | **ρ (feature, SHAP)** | **Cliff’s δ (95% CI)** | **Friedman H²** | **Consensus Rank** |
| --- | --- | --- | --- | --- | --- |
| **MSEₘₗ** | 0.09 ± 0.01 | +0.74 (p < 0.001) | +0.05 (–0.09; 0.16) | 0.025 | 1 |
| **Weight** | 0.05 ± 0.01 | –0.52 (p = 0.007) | +0.28 (0.12; 0.40) | 0.011 | 4 |
| **Gait Speed** | 0.04 ± 0.02 | –0.41 (p = 0.021) | –0.31 (–0.45; –0.17) | 0.042 | 2 |
| **MSEᵥ** | 0.04 ± 0.01 | +0.33 (p = 0.046) | –0.17 (–0.29; –0.05) | 0.025 | 3 |
| **iHRᵥ** | 0.04 ± 0.01 | +0.29 (p = 0.062) | –0.06 (–0.20; 0.08) | 0.019 | 6 |
| **MSEₐₚ** | 0.03 ± 0.01 | +0.26 (p = 0.071) | +0.11 (–0.02; 0.25) | 0.023 | 5 |
| **Age** | 0.03 ± 0.01 | –0.18 (p = 0.18) | –0.04 (–0.17; 0.09) | – | 7 |
| **Sex** | 0.03 ± 0.01 | –0.21 (p = 0.14) | –0.15 (–0.27; –0.04) | 0.042 | 8 |
| **H–Y** | 0.02 ± 0.01 | –0.10 (p = 0.36) | –0.21 (–0.33; –0.09) | 0.005 | 9 |
| **DD** | 0.01 ± 0.01 | +0.08 (p = 0.41) | +0.27 (0.09; 0.39) | – | 10 |

Supplementary Table S5. Summary of explainability metrics for the Random Forest model. Each feature’s contribution to the model output is described by the mean absolute SHAP value (|SHAP|), the Spearman correlation between feature value and SHAP contribution (ρ), the effect size (Cliff’s δ) comparing PB+ vs PB– patients, and the Friedman H² statistic indicating pairwise interaction strength. The consensus rank combines Random Forest and SHAP importance orderings. ranked first across all metrics, followed by gait speed, and body weight, defining the core biomechanical signature of the prodromal triad.

Transparency Statement

Objective: To classify Parkinson’s disease patients with and without prodromal burden, where PB+ represents pathological subjects with, at least, three prodromal signs.

Input data: Thirty-five gait and clinical variables derived from a single lumbar inertial sensor (L5).

Final predictors: Medio-lateral multiscale entropy (), vertical improved harmonic ratio (iHRᵥ), vertical and antero-posterior components (, ), and body weight.

Model type: Random Forest classifier balanced through a Conditional Tabular Generative Adversarial Network (CTGAN).

Performance: ROC AUC = 0.84, PR AUC = 0.86, F1 = 0.76.

Explainability tools: SHAP values, interaction network analysis and surrogate decision tree.

Population: 275 Parkinson’s patients (Hoehn & Yahr stages 1–4), of whom 40 % were PB+.

Intended use: Research screening for early prodromal risk identification.

Limitations: Single-sensor configuration and lack of external validation cohort.
